# Supplementary material for: Controlling the Nucleation and Growth of Salt from Bodily Fluid for Enhanced Biosensing Applications
Source: MDPI journal article supplement (doi:10.3390/bios13121016), 2023-12-06
Supplement: s1 [file s1]

# ***Controlling the nucleation and growth of salt from bodily fluid for enhanced biosensing application***

Siddharth Srivastava <sup>1</sup>, Yusuke Terai <sup>1,2</sup>, Jun Liu <sup>1</sup>, Giovanni Capellini <sup>3,4</sup> and Ya-Hong Xie <sup>1,5,\*</sup>

<sup>1</sup> Department of Materials Science and Engineering, University of California, Los Angeles, CA 90095, USA; sidsri@ucla.edu (S.S.); yterai1105@gmail.com (Y.T.)

<sup>2</sup> Department of Micro-Nano Mechanical Science and Engineering, Nagoya University, Nagoya 464-8601, Japan

<sup>3</sup> IHP—Leibniz Institute for High Performance Microelectronics, 15236 Frankfurt (Oder), Germany; giovanni.capellini@uniroma3.it

<sup>4</sup> Department of Science, Università Degli Studi Roma Tre, Viale Marconi, 446 Rome, Italy

<sup>5</sup> Jonsson Comprehensive Cancer Center, University of California, Los Angeles, CA 90095, USA

\* Correspondence: yhx@ucla.edu

## **SUPPLEMENTARY DATA**

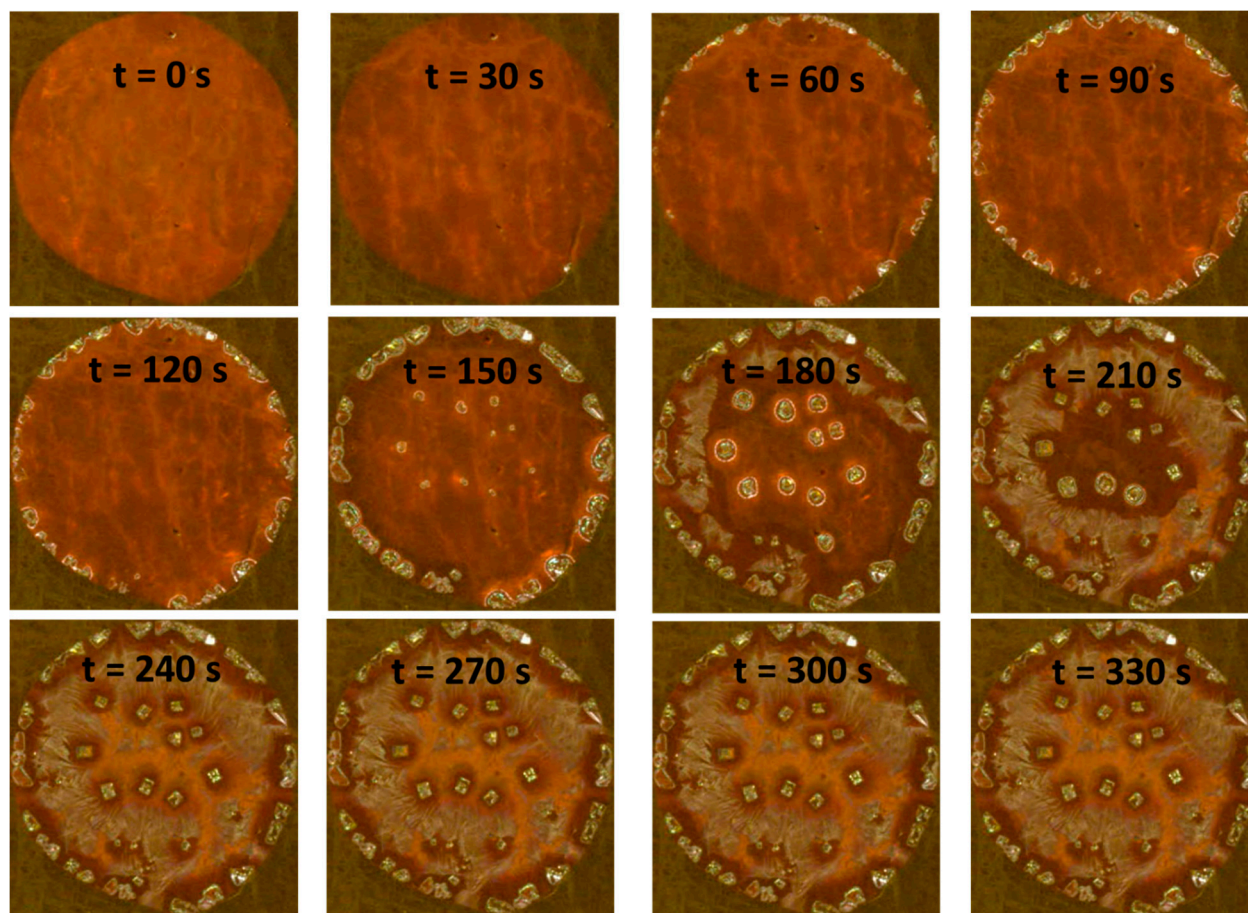

**Figure S1.** Progression of crystallization

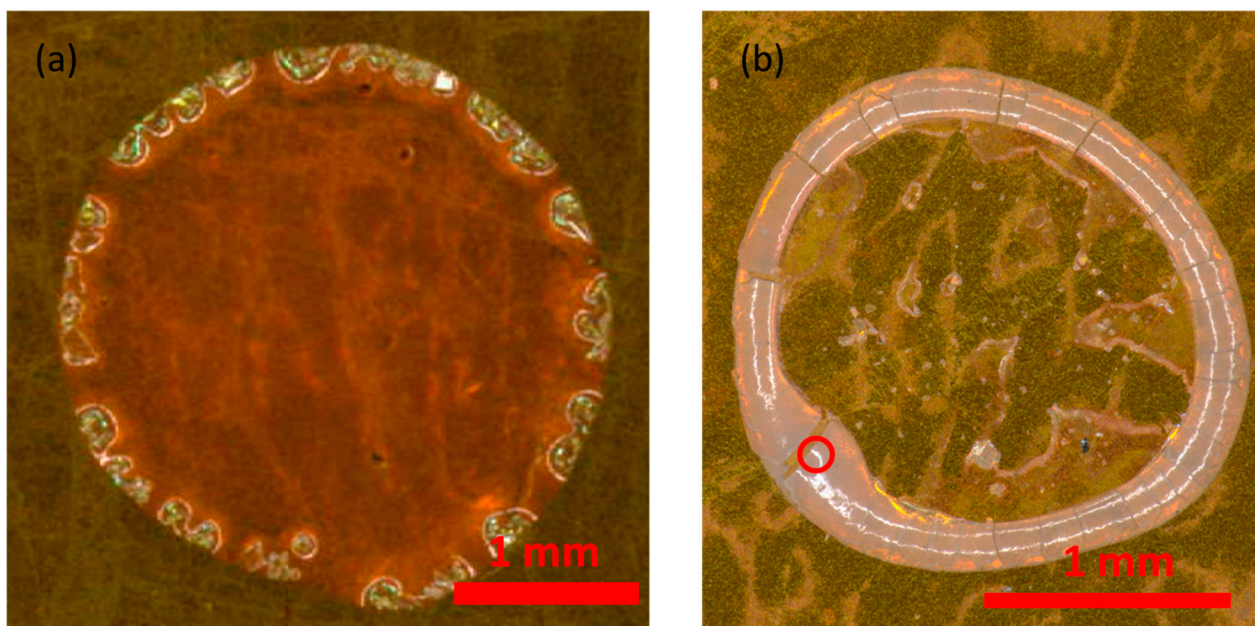

**Figure S2.** Coffee-ring formation for (a) PBS solution, (b) PS in DI water

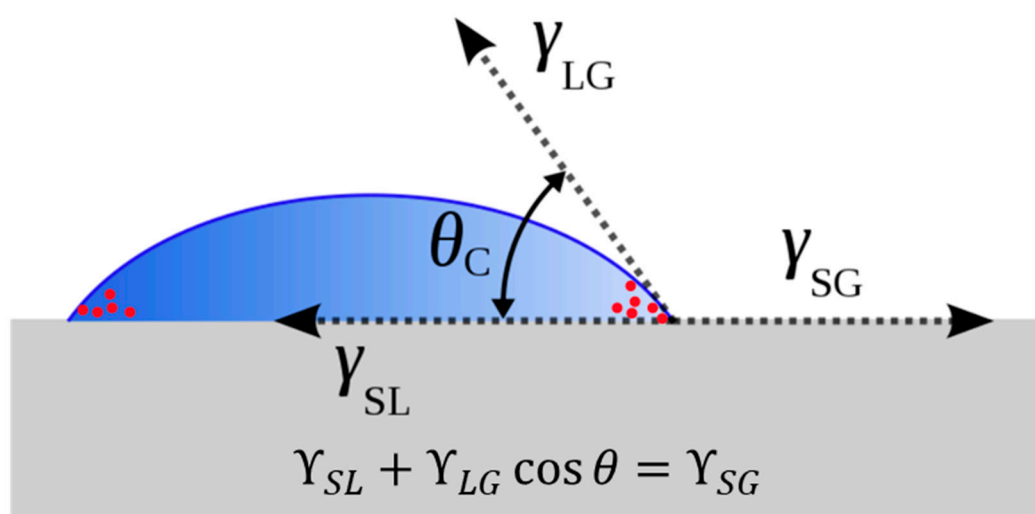

**Figure S3.** Force balance for surface tension components at the contact line at droplet-substrate interface

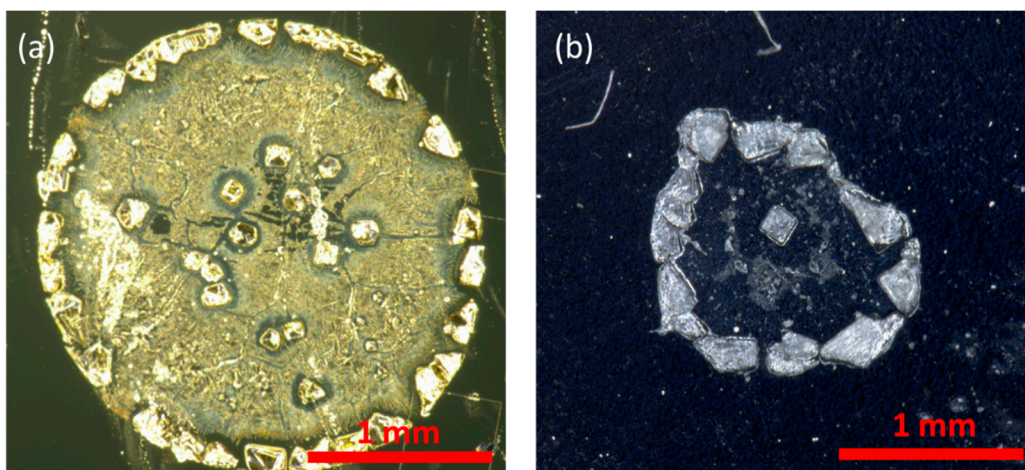

**Figure S4.** No laser-induced precipitation observed on (a) Unpatterned Au substrate, (b) Silicon substrate

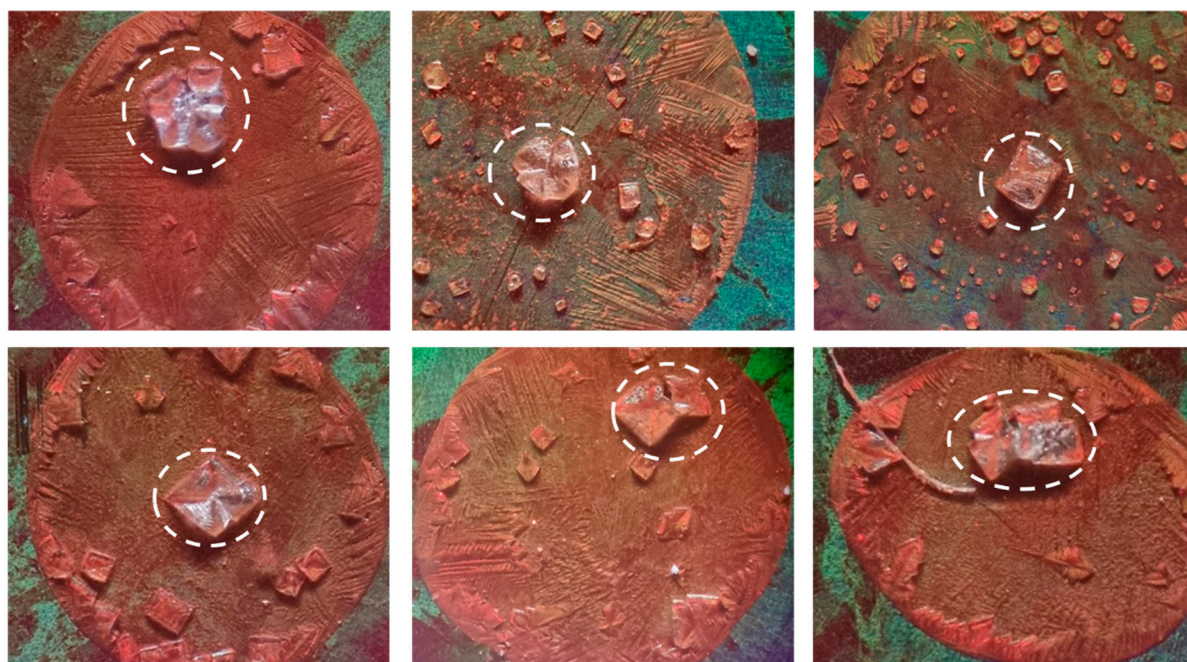

**Figure S5.** Repeated observation of plasmonic precipitation

**Table S1.** PBS Composition

| Reagent                          | Amount, g | Concentration, mM |
|----------------------------------|-----------|-------------------|
| NaCl                             | 8         | 137               |
| KCl                              | 0.2       | 2.7               |
| Na <sub>2</sub> HPO <sub>4</sub> | 1.44      | 10                |
| KH <sub>2</sub> HPO <sub>4</sub> | 0.24      | 1.8               |
